# Supplementary material for: CD8+ T cells from patients with narcolepsy and healthy controls recognize hypocretin neuron-specific antigens
Source: PubMed Central journal article supplement (PMC6381094; doi:10.1038/s41467-019-08774-1), 2019-02-19
Supplement: 41467_2019_8774_MOESM1_ESM.pdf [file 41467_2019_8774_MOESM1_ESM.pdf]

**CD8 T cells from patients with narcolepsy  
and healthy controls recognize hypocretin  
neuron-specific antigens**

Pedersen et al.

| Patients         | HLA-A    |             | HLA-B    |          | HLA-C    |          | HLA-DQA1 |          | HLA-DQB1 |          |
|------------------|----------|-------------|----------|----------|----------|----------|----------|----------|----------|----------|
| 2                | 02:01:01 | 29:02:01    | 07:02:01 | 15:01:01 | 03:04:01 | 07:02:01 | 01:02:01 | 05:01:01 | 02:01:01 | 06:02:01 |
| 3                | 03:01:01 | 11:01:01    | 35:01:01 | 55:01:01 | 03:03:01 | 04:01:01 | 01:01:01 | 01:02:01 | 05:01:01 | 06:02:01 |
| 4                | 01:01:01 | 02:01:01    | 07:02:01 | 08:01:01 | 07:01:01 | 07:02:01 | 01:02:01 |          | 06:02:01 |          |
| 5                | 02:01:01 |             | 18:01:01 | 44:02:01 | 05:01:01 | 07:01:01 | 01:02:01 | 03:03:01 | 03:01:01 | 06:02:01 |
| 6                | 03:01:01 | 68:01:02    | 35:01:01 | 51:01:01 | 04:01:01 | 15:02:01 | 01:01:01 | 01:02:01 | 05:01:01 | 06:02:01 |
| 7                | 02:01:01 | 24:02:01    | 07:02:01 |          | 07:02:01 |          | 01:02:01 |          | 06:02:01 |          |
| 8                | 03:01:01 |             | 07:02:01 |          | 07:02:01 |          | 01:02:01 |          | 06:02:01 |          |
| 9                | 02:01:01 |             | 07:02:01 | 15:01:01 | 03:04:01 | 07:02:01 | 01:02:01 | 03:01:01 | 03:02:01 | 06:02:01 |
| 10               | 03:01:01 | 11:01:01    | 07:02:01 | 51:01:01 | 07:02:01 | 15:02:01 | 01:02:01 | 03:01:01 | 03:02:01 | 06:02:01 |
| 12               | 03:01:01 | 25:01:01    | 07:02:01 | 18:01:01 | 07:02:01 | 12:03:01 | 01:02:01 |          | 06:02:01 |          |
| 13               | 01:01:01 | 03:01:01    | 07:02:01 | 15:01:01 | 07:02:01 |          | 01:02:01 | 05:05:01 | 03:01:01 | 06:02:01 |
| 14               | 11:01:01 | 24:02:01    | 40:01:02 | 52:01:01 | 03:04:01 | 12:02:02 | 01:03:01 | 03:03:01 | 03:01:01 | 06:01:01 |
| 15               | 11:01:01 | 24:02:01    | 07:02:01 | 35:01:01 | 04:01:01 | 07:02:01 | 01:02:01 | 03:01:01 | 03:02:01 | 06:02:01 |
| 16               | 02:01:01 | 26:01:01:01 | 07:02:01 | 39:01:01 | 07:02:01 | 12:03:01 | 01:02:01 | 01:03:01 | 06:02:01 | 06:03:01 |
| 17               | 01:01:01 | 02:01:01    | 44:02:01 | 57:01:01 | 05:01:01 | 06:02:01 | 01:01:01 | 01:02:01 | 05:01:01 | 06:02:01 |
| 18               | 01:01:01 | 02:01:01    | 08:01:01 | 44:02:01 | 05:01:01 | 07:01:01 | 01:02:01 | 05:05:01 | 03:01:01 | 06:02:01 |
| 19               | 01:01:01 | 03:01:01    | 07:02:01 |          | 07:02:01 |          | 01:02:01 | 01:04:01 | 05:03:01 | 06:02:01 |
| 20               | 01:01:01 | 02:01:01    | 08:01:01 | 51:01:01 | 01:02:01 | 07:01:01 | 01:02:01 |          | 06:02:01 |          |
| 21               | 02:01:01 | 03:01:01    | 07:02:01 | 15:01:01 | 03:04:01 | 07:02:01 | 01:02:01 | 03:01:01 | 03:02:01 | 06:02:01 |
| 22               | 02:01:01 | 25:01:01    | 18:01:01 | 57:01:01 | 06:02:01 | 12:03:01 | 01:02:01 | 02:01:01 | 03:03:02 | 06:02:01 |
| Healthy controls |          |             |          |          |          |          |          |          |          |          |
| 101              | 01:01:01 | 02:01:01    | 07:02:01 | 08:01:01 | 07:01:01 | 07:02:01 | 01:02:01 | 03:02    | 03:03:02 | 06:02:01 |
| 103              | 03:01:01 | 23:01:01    | 35:01:01 | 44:02:01 | 04:01:01 | 07:04:01 | 01:01:01 | 01:02:01 | 05:01:01 | 06:04:01 |
| 105              | 01:01:01 | 02:01:01    | 39:06:02 | 57:01:01 | 06:02:01 | 07:02:01 | 01:02:01 | 02:01:01 | 03:03:02 | 06:02:01 |
| 106              | 02:01:01 | 32:01:01    | 07:02:01 | 14:02:01 | 02:02:02 | 08:02:01 | 01:01:02 | 02:01:01 | 02:02:01 | 05:01:01 |
| 109              | 25:01:01 | 29:02:01    | 18:01:01 | 44:03:01 | 12:03:01 | 16:01:01 | 01:01:01 | 02:01:01 | 02:02:01 | 05:01:01 |
| 111              | 02:01:01 |             | 15:01:01 | 40:01:02 | 03:04:01 |          | 01:02:01 | 03:01:01 | 03:02:01 | 06:04:01 |
| 112              | 24:02:01 | 30:04:01    | 07:02:01 | 50:01:01 | 06:02:01 | 07:02:01 | 02:01:01 | 05:05:01 | 02:02:01 | 03:01:01 |
| 113              | 11:01:01 | 23:01:01    | 07:02:01 | 35:01:01 | 04:01:01 | 07:02:01 | 01:01:01 | 01:02:01 | 05:01:01 | 06:02:01 |
| 114              | 02:01:01 | 68:01:02    | 44:02:01 | 51:01:01 | 05:01:01 | 14:02:01 | 01:03:01 | 02:01:01 | 02:02:01 | 06:03:01 |
| 115              | 01:01:01 | 03:01:01    | 18:01:01 | 37:01:01 | 06:02:01 | 12:03:01 | 01:01:01 | 05:05:01 | 03:01:01 | 05:01:01 |
| 116              | 02:01:01 | 03:01:01    | 15:01:01 | 18:01:01 | 03:03:01 | 05:01:01 | 05:01:01 | 05:05:01 | 02:01:01 | 03:01:01 |
| 118              | 02:01:01 | 03:01:01    | 40:02:01 | 51:01:01 | 01:02:01 | 02:02:02 | 01:03:01 | 05:01:01 | 02:01:01 | 06:03:01 |
| 119              | 02:01:01 | 23:01:01    | 07:02:01 | 44:03:01 | 04:01:01 | 07:02:01 | 01:03:01 | 02:01:01 | 02:02:01 | 06:03:01 |
| 120              | 02:01:01 | 11:01:01    | 39:01:01 | 44:02:01 | 07:02:01 | 07:04:01 | 01:02:01 | 02:01:01 | 03:03:02 | 06:02:01 |
| 121              | 24:02:01 | 33:03:01    | 07:02:01 | 14:02:01 | 07:02:01 | 08:02:01 | 01:01:01 | 01:02:01 | 05:01:01 | 06:02:01 |
| 122              | 02:01:01 | 03:01:01    | 35:01:01 | 44:02:01 | 04:01:01 | 05:01:01 | 01:02:01 | 03:03:01 | 03:01:01 | 06:04:01 |
| 123              | 01:01:01 | 02:01:01    | 08:01:01 | 40:01:02 | 07:01:01 | 14:02:01 | 01:02:01 | 05:01:01 | 02:01:01 | 06:04:01 |
| 124              | 03:01:01 |             | 07:02:01 |          | 07:02:01 |          | 01:02:01 |          | 06:02:01 |          |
| 125              | 02:01:01 | 29:02:01    | 38:01:01 | 44:02:01 | 05:01:01 | 12:03:01 | 01:04:01 | 05:01:01 | 02:01:01 | 05:03:01 |
| 126              | 02:01:01 | 11:01:01    | 18:01:01 | 57:01:01 | 05:01:01 | 06:02:01 | 01:03:01 | 02:01:01 | 03:03:02 | 06:01:01 |
| 127              | 02:01:01 | 30:01:01    | 13:02:01 | 15:01:01 | 06:02:01 | 07:02:01 | 01:02:01 | 02:01:01 | 03:02:01 | 06:02:01 |
| 128              | 03:01:01 | 25:01:01    | 18:01:01 | 40:01:02 | 03:04:01 | 12:03:01 | 01:02:01 | 01:02:02 | 05:02:01 | 06:02:01 |
| 129              | 02:01:01 | 02:05:01    | 44:02:01 | 50:01:01 | 05:01:01 | 06:02:01 | 01:02:01 | 03:01:01 | 03:02:01 | 06:09:01 |
| 130              | 03:01:01 | 26:01:01:01 | 38:01:01 | 40:01:02 | 03:04:01 | 12:03:01 | 01:02:01 | 05:05:01 | 03:01:01 | 06:04:01 |
| 131              | 25:01:01 | 32:01:01    | 18:01:01 | 27:05:02 | 02:02:02 | 12:03:01 | 01:02:01 | 03:02    | 03:03:02 | 06:02:01 |
| 132              | 02:01:01 | 11:01:01    | 40:01:02 | 44:02:01 | 03:04:01 | 05:01:01 | 01:02:01 | 03:03:01 | 03:01:01 | 06:04:01 |
| 133              | 02:01:01 | 03:01:01    | 07:02:01 | 57:01:01 | 06:02:01 | 07:02:01 | 01:02:01 | 01:04:01 | 05:03:01 | 06:02:01 |
| 143              | 03:01:01 | 11:01:01    | 07:02:01 | 40:02:01 | 02:02:02 | 07:02:01 | 01:02:01 | 05:05:01 | 03:01:01 | 06:02:01 |
| 145              | 01:01:01 | 11:01:01    | 07:02:01 | 18:01:01 | 07:01:01 | 07:02:01 | 01:02:01 | 03:01:01 | 03:02:01 | 06:02:01 |
| 136              | 03:01:01 | 24:02:01    | 07:02:01 | 15:01:01 | 03:03:01 | 07:02:01 | 01:02:01 | 05:05:01 | 03:01:01 | 06:02:01 |
| 137              | 02:01:01 | 11:01:01    | 44:02:01 | 56:01:01 | 01:02:01 | 05:01:01 | 01:03:01 | 03:01:01 | 03:02:01 | 06:03:01 |
| 138              | 02:01:01 | 24:02:01    | 44:02:01 | 55:01:01 | 03:03:01 | 05:01:01 | 01:01:01 | 01:02:01 | 05:01:01 | 06:04:01 |
| 140              | 01:01:01 | 02:01:01    | 07:02:01 | 08:01:01 | 07:01:01 | 07:02:01 | 01:02:01 | 05:01:01 | 02:01:01 | 06:02:01 |
| 141              | 02:01:01 | 03:01:01    | 14:01:01 | 14:02:01 | 08:02:01 |          | 01:02:01 | 03:03:01 | 03:02:01 | 06:09:01 |
| 142              | 02:01:01 | 31:01:02    | 07:06:01 | 40:01:02 | 03:04:01 | 15:05:02 | 01:03:01 | 03:01:01 | 03:02:01 | 06:03:01 |
| 143              | 03:01:01 | 11:01:01    | 35:01:01 | 41:02:01 | 04:01:01 | 17:03    | 01:02:01 | 03:03:01 | 03:01:01 | 06:02:01 |
| 144              | 01:01:01 | 03:01:01    | 07:02:01 | 08:01:01 | 07:01:01 | 07:02:01 | 01:02:01 | 05:01:01 | 02:01:01 | 06:02:01 |
| 145              | 02:01:01 | 11:01:01    | 07:02:01 | 55:01:01 | 03:03:01 | 07:02:01 | 01:02:01 | 01:04:01 | 05:03:01 | 06:02:01 |
| 146              | 03:01:01 | 25:01:01    | 18:01:01 | 35:01:01 | 04:01:01 | 12:03:01 | 01:02:01 |          | 06:02:01 |          |
| 147              | 02:01:01 | 31:01:02    | 27:05:02 | 40:01:02 | 02:02:02 | 03:04:01 | 01:02:01 | 03:03:01 | 03:02:01 | 06:04:01 |
| 148              | 02:01:01 | 11:01:01    | 35:01:01 | 40:02:01 | 02:02:02 | 04:01:01 | 01:03:01 | 03:01:01 | 03:02:01 | 06:03:01 |
| 149              | 03:01:01 | 24:02:01    | 15:01:01 | 38:01:01 | 03:04:01 | 12:03:01 | 01:03:01 | 03:01:01 | 03:02:01 | 06:03:01 |
| 150              | 02:01:01 |             | 40:01:02 | 44:02:01 | 03:04:01 | 05:01:01 | 01:01:01 | 01:03:01 | 05:01:01 | 06:03:01 |
| 151              | 02:01:01 | 24:02:01    | 40:01:02 | 44:02:01 | 03:04:01 | 16:04:01 | 01:02:01 | 05:05:01 | 03:01:01 | 06:02:01 |
| 152              | 02:01:01 | 03:01:01    | 35:01:01 | 39:01:01 | 04:01:01 | 12:03:01 | 01:02:01 | 05:05:01 | 03:01:01 | 06:04:01 |
| 153              | 02:01:01 |             | 40:01:02 | 44:02:01 | 03:04:01 | 05:01:01 | 01:01:01 | 01:02:01 | 05:01:01 | 06:04:01 |
| 154              | 02:01:01 | 31:01:02    | 40:01:02 | 51:01:01 | 03:04:01 | 15:02:01 | 01:02:01 | 03:01:01 | 03:02:01 | 06:04:01 |
| 155              | 02:01:01 | 11:01:01    | 39:06:02 | 40:01:02 | 03:04:01 | 07:02:01 | 01:02:01 | 03:01:01 | 03:02:01 | 06:04:01 |
| 156              | 02:01:01 | 02:05:01    | 07:02:01 | 50:01:01 | 06:02:01 | 07:02:01 | 01:02:01 | 02:01:01 | 02:02:01 | 06:02:01 |
| 157              | 02:01:01 |             | 35:01:01 | 44:02:01 | 03:03:01 | 05:01:01 | 01:02:01 | 03:02    | 03:03:02 | 06:02:01 |
| 158              | 01:01:01 | 02:01:01    | 07:02:01 | 08:01:01 | 07:01:01 | 07:02:01 | 01:02:01 | 05:01:01 | 02:01:01 | 06:02:01 |
| 159              | 02:01:01 | 02:06:01    | 15:01:01 | 40:06:01 | 03:03:01 | 08:01:01 | 01:02:01 | 01:03:01 | 06:01:01 | 06:02:01 |

### Supplementary Table 1

The full HLA type of each donor.

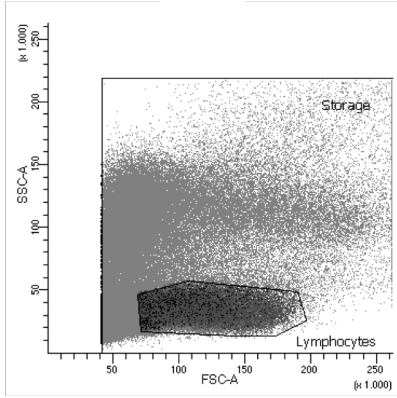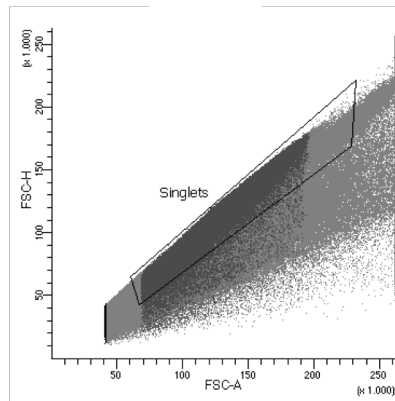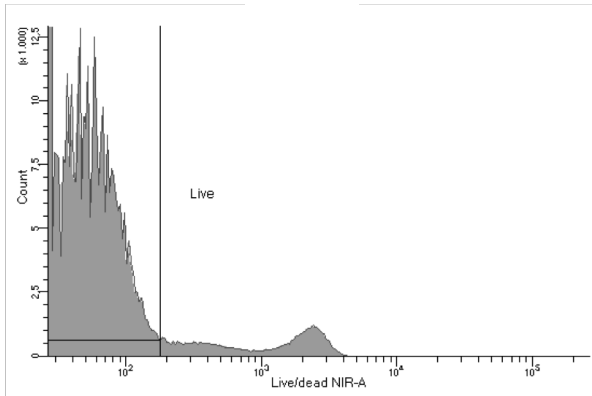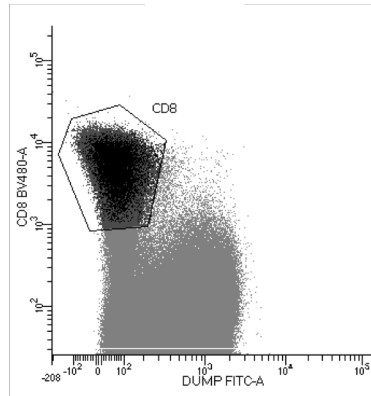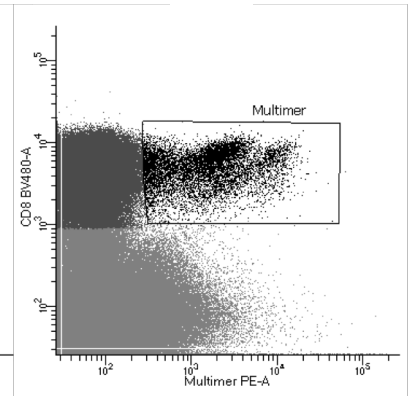

Tube: 2

| Population  | #Events   | %Parent | %Total |
|-------------|-----------|---------|--------|
| All Events  | 2.054.539 | ###     | 100,0  |
| Storage     | 2.032.190 | 98,9    | 98,9   |
| Lymphocytes | 806.906   | 39,7    | 39,3   |
| Singlets    | 800.318   | 99,2    | 39,0   |
| Live        | 756.090   | 94,5    | 36,8   |
| CD8         | 226.527   | 30,0    | 11,0   |
| Multimer    | 8.651     | 3,8     | 0,4    |

### Supplementary Figure 1

Gating strategy. Gating strategy used to identify single, live lymphocytes and within these, CD8 and MHC multimer specific T cells. The gating strategy depicted here is applied to all experiments from which data is shown in figures 2-4.

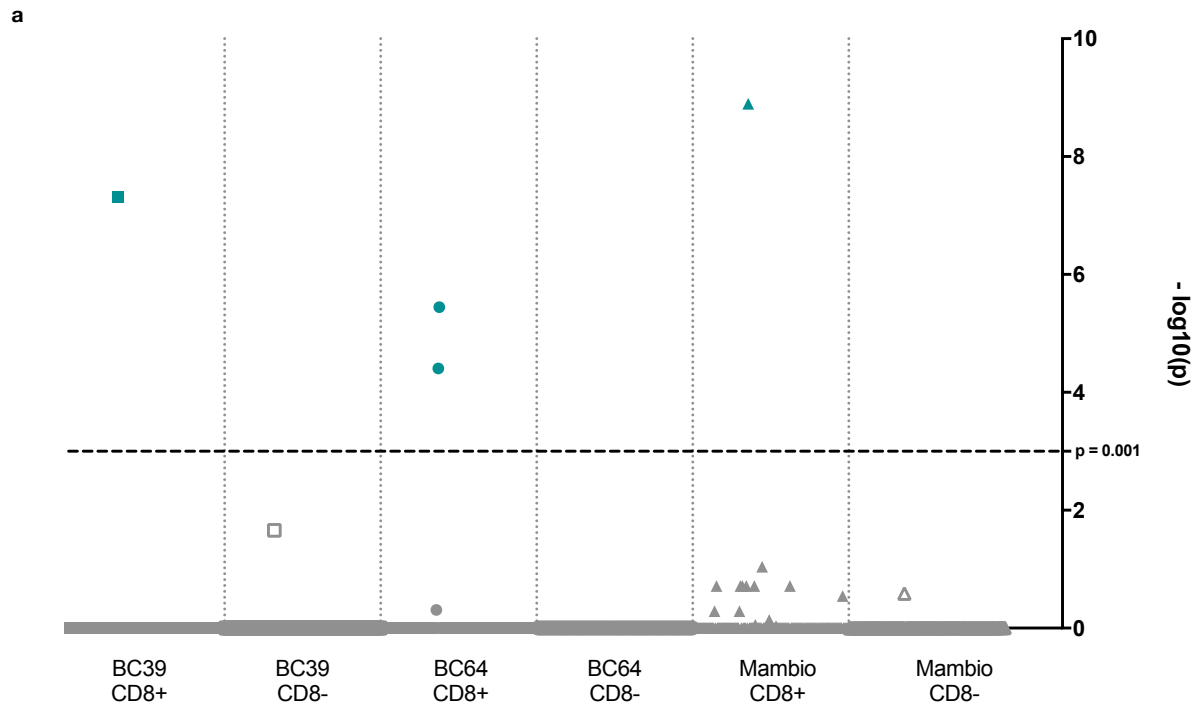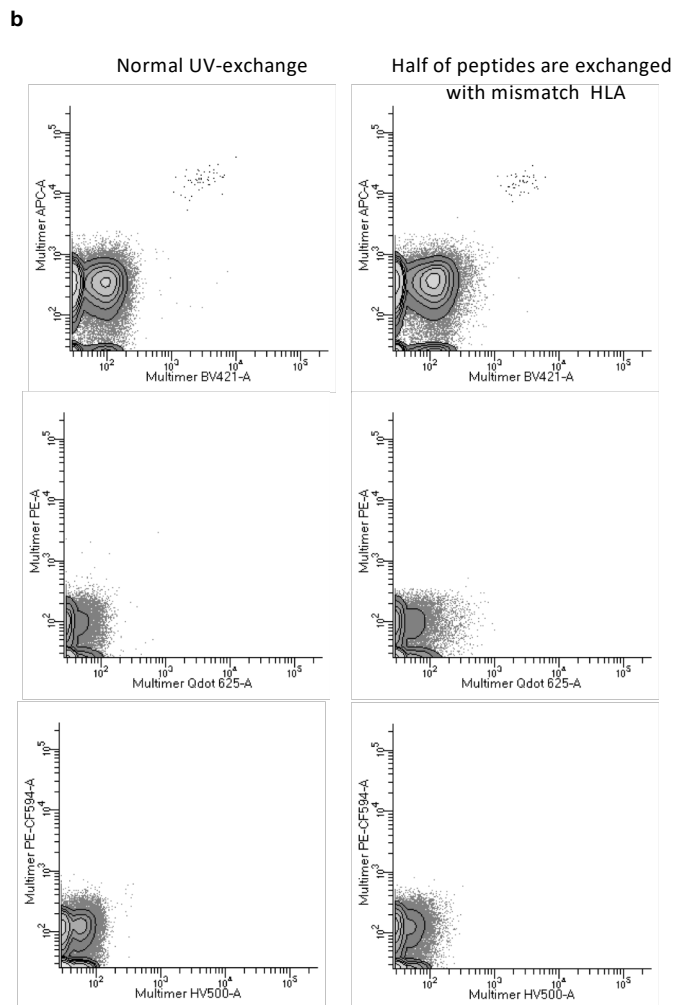

### Supplementary Figure 2

Technical information related to T-cell detection using barcoded MHC multimers. **a** Virus-epitope recognition restricted to HLA-A\*02:01 and HLA-B\*07:02, detected in a test experiment where both CD8<sup>+</sup> multimer<sup>+</sup> cells and CD8<sup>-</sup> cells were sorted and the associated DNA barcodes were amplified and sequenced.  $p$  values from sequencing analysis are log transformed for visualization. No significant pMHC recognition is determined in the CD8 negative population. **b** Detection of virus-epitope recognition based on combinatorial fluorescence encoding using 27 different pMHC multimers, derived from UV-induced peptide exchange either using HLA-relevant virus epitopes (left panel) or in a separate panel where half of the peptides were replaced with an irrelevant HLA non-matching (non-binding) HLA-A\*03:01 peptide (right panel). No significant enhancement of background was observed when half on the pMHC complexes where non-functional, unstable, pMHC combinations. BC: Healthy donor, Mambio: sample from a breast cancer patient.

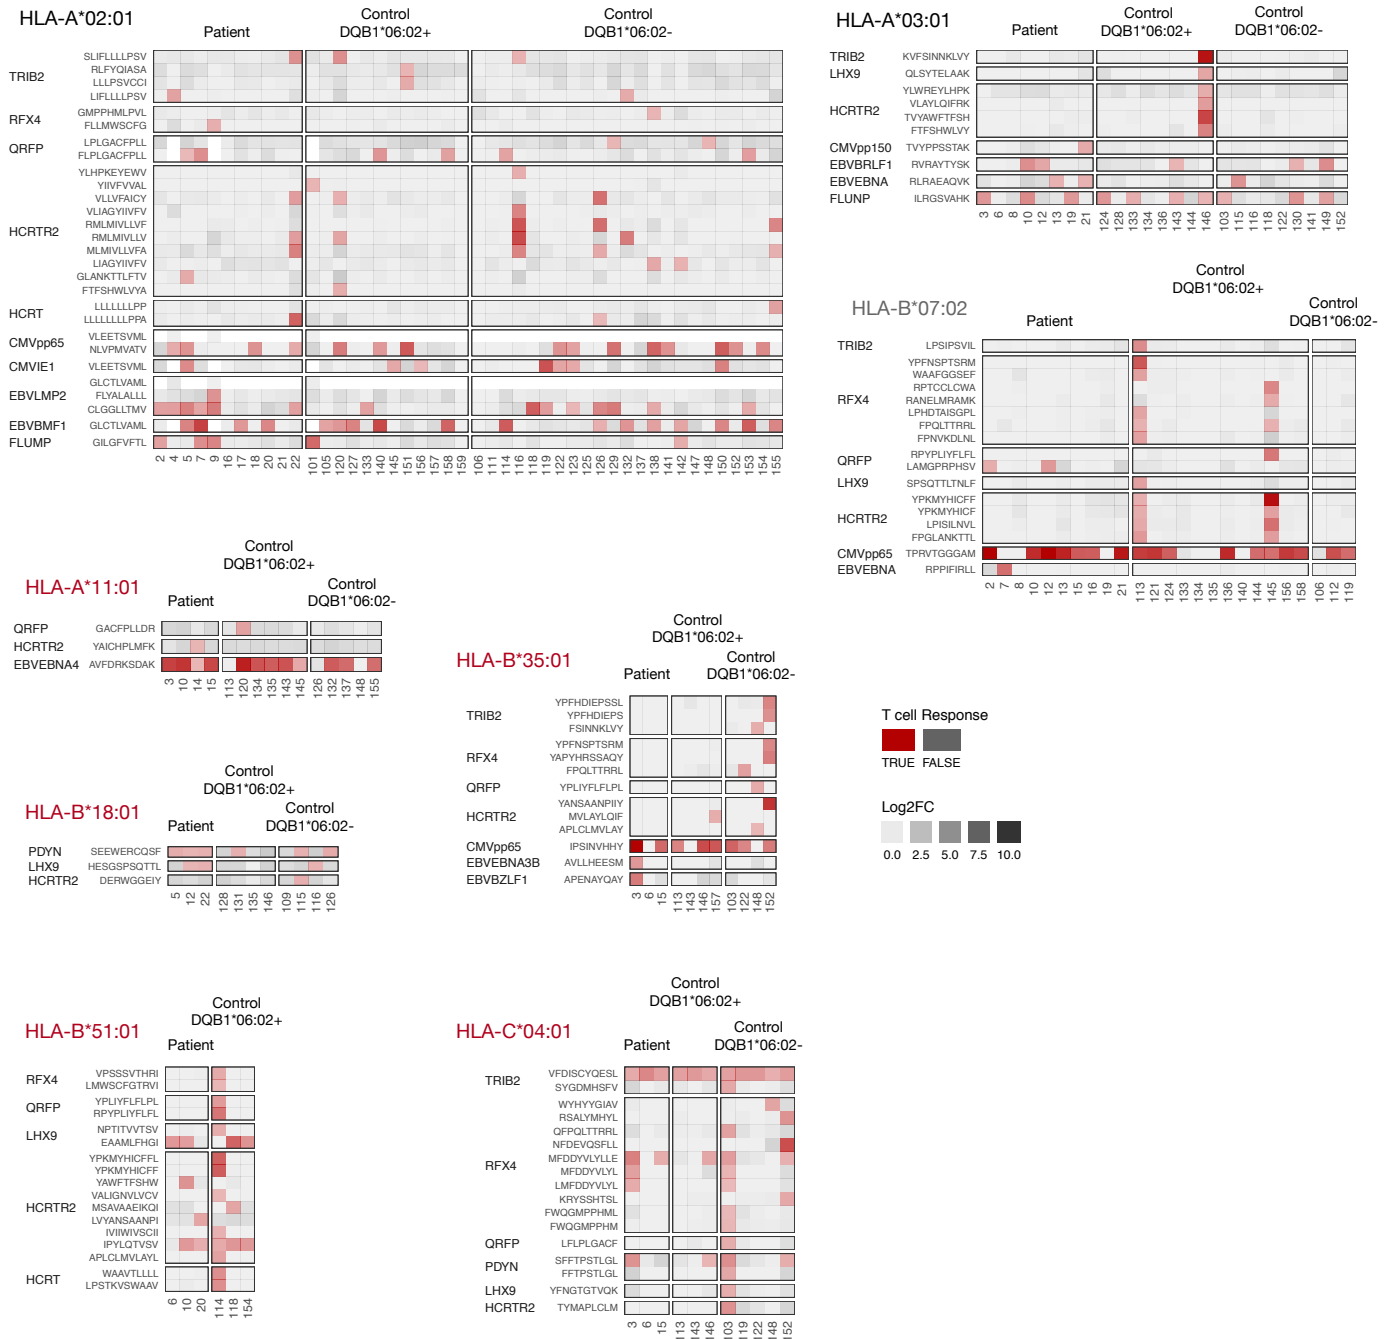

### Supplementary Figure 3

Overview of CD8<sup>+</sup> T cell recognition. Overview of all peptides for which CD8<sup>+</sup> T cell recognition was detected and their HLA restriction. Red color indicates detected CD8<sup>+</sup> T cell recognition of the given peptide within the given donor (number below the panels).

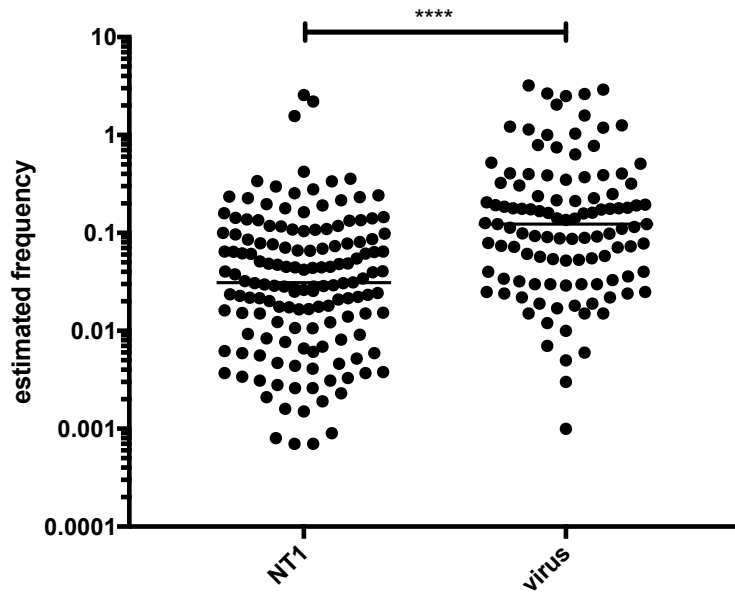

**Supplementary Figure 4**

NT1 and virus recognition. Estimated frequency of all CD8<sup>+</sup> T cell populations with specificity for narcolepsy relevant peptides and virus peptides, across all donor cohorts,  $p < 0.0001$ . (T test on log transformed data). Bars represent median values with 95% CI.

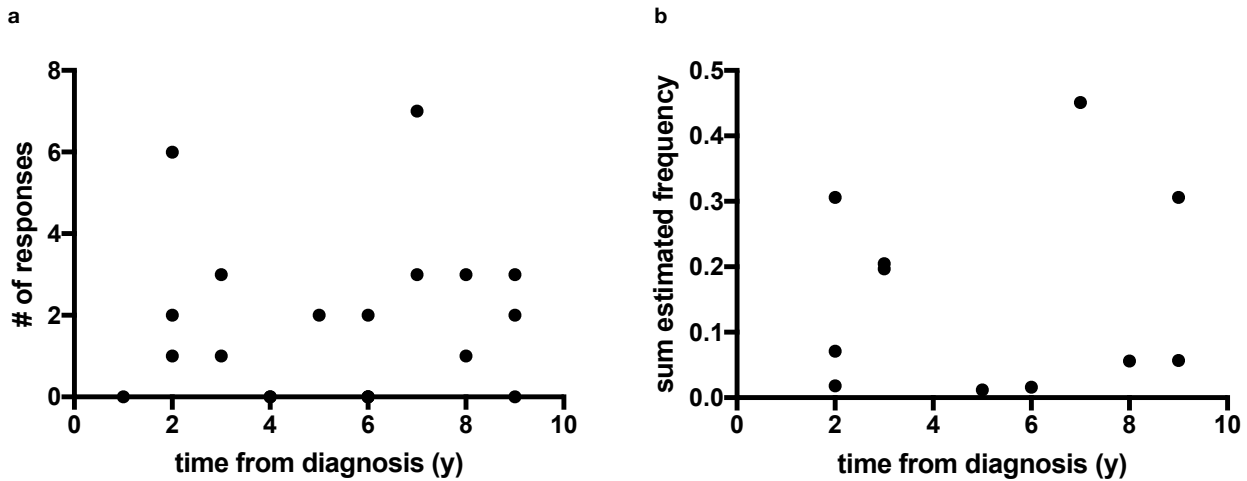

**Supplementary Figure 5**

Kinetics of T cell recognition. **a** The time from diagnosis of NT1 is plotted against the number of peptide-specific CD8<sup>+</sup> T cell populations detected and **b** sum of estimated frequencies. Each dot represents one NT1 patient. No correlation was observed.

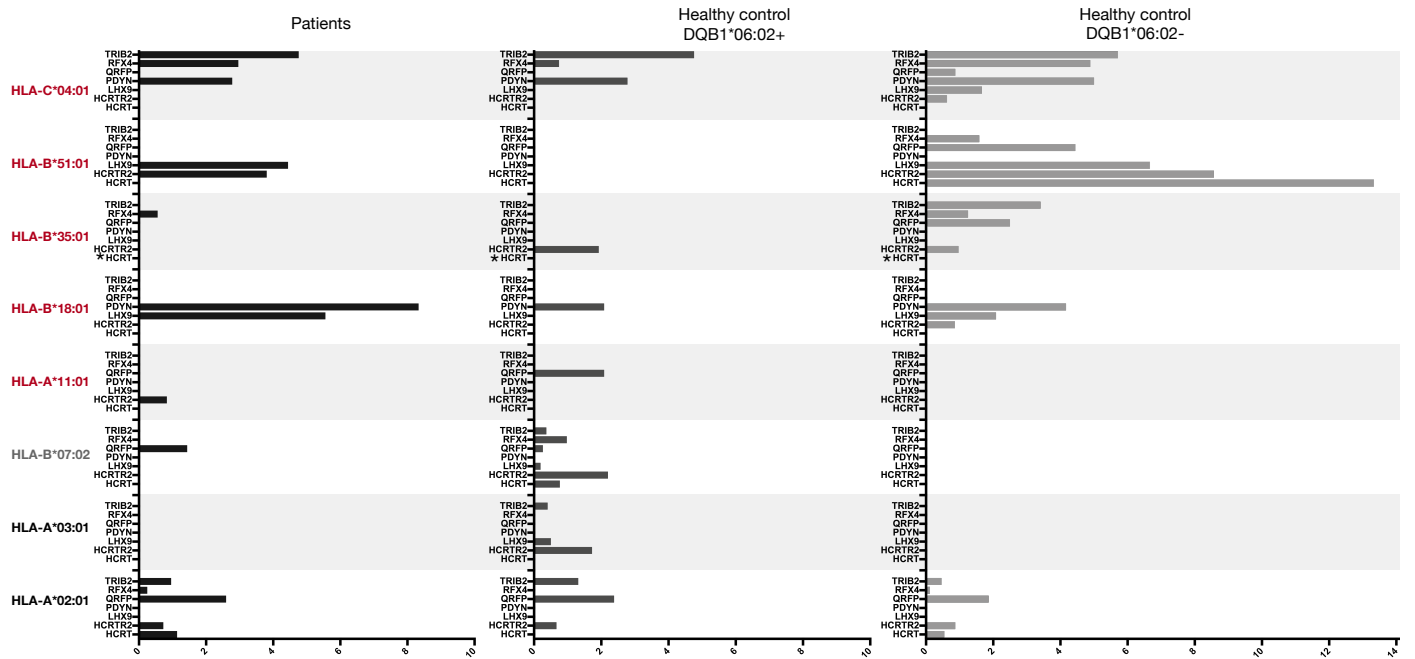

### Supplementary Figure 6

The response percentage within each protein and HLA type. The number of CD8<sup>+</sup> T cell responses within a given protein across all donors with a specific HLA type, out of the total number of possible responses (i.e. number of pMHC complexes included for that given protein and HLA combination\* number of donors with the HLA type). n = the number of donors in each HLA type.

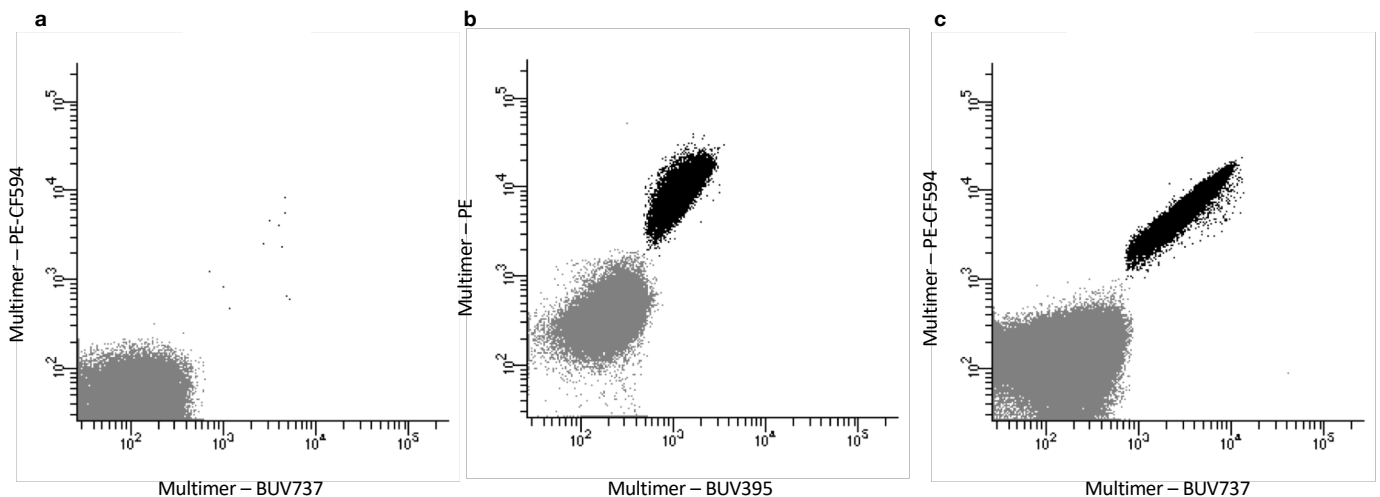

### Supplementary Figure 7

Verification of T cell recognition toward an NT1-relevant peptide. **a** Dot plot showing an ex vivo MHC multimer staining for the LHX9 peptide EAAMLFHGI, binding to HLA-B\*51:01 in patient 6. The EAAMLFHGI multimer was made with 2 different fluorochromes, PE-CF594 and BU737 and double positive cells are pMHC specific T cells. **b** and **c** Examples of dot plots showing virus-epitope specific T cells after enrichment from a Narcolepsy patient and healthy donor respectively. PE: phycoerythrin. BU: brilliant ultra violet.

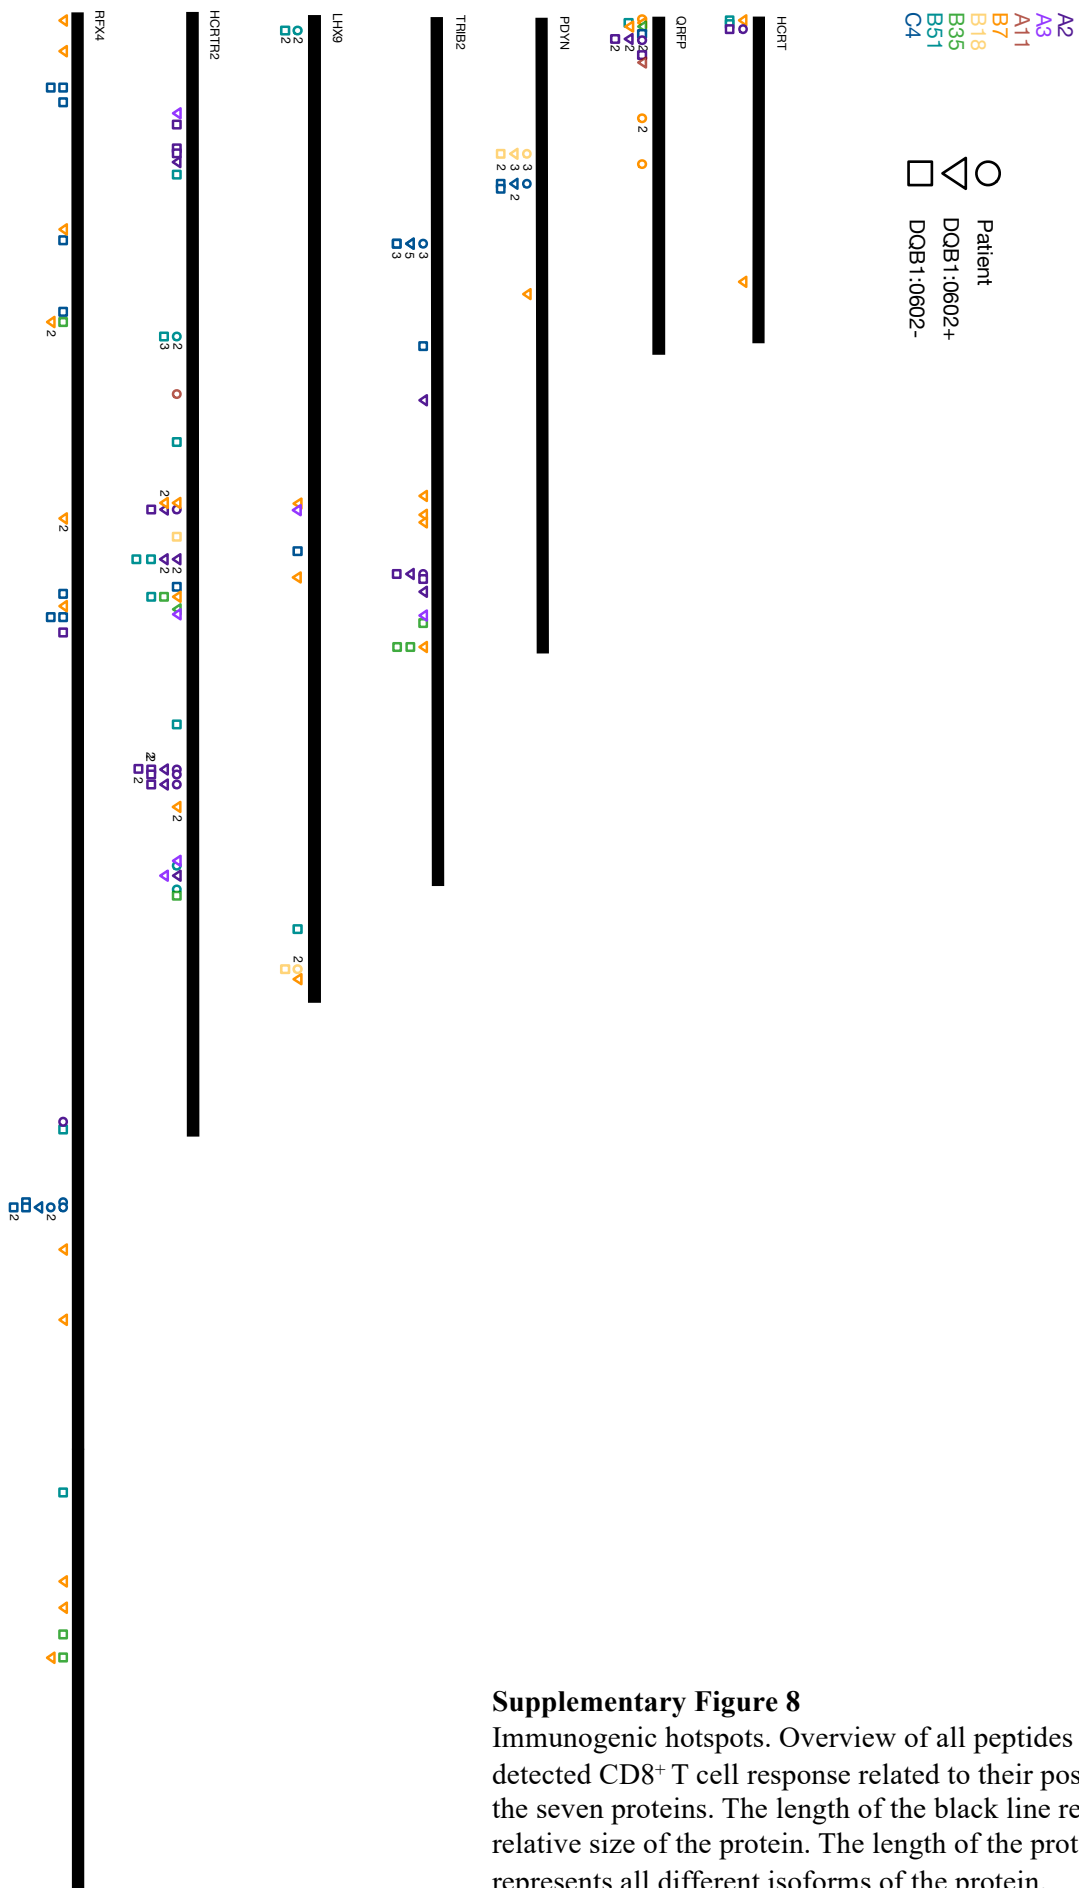

**Supplementary Figure 8**

Immunogenic hotspots. Overview of all peptides with a detected CD8<sup>+</sup> T cell response related to their position within the seven proteins. The length of the black line represents the relative size of the protein. The length of the protein represents all different isoforms of the protein.
